# Supplementary material
Source: PubMed Central journal article supplement (PMC3575195)
Supplement: NIHMS425665-supplement-1.pdf [file NIHMS425665-supplement-1.pdf]

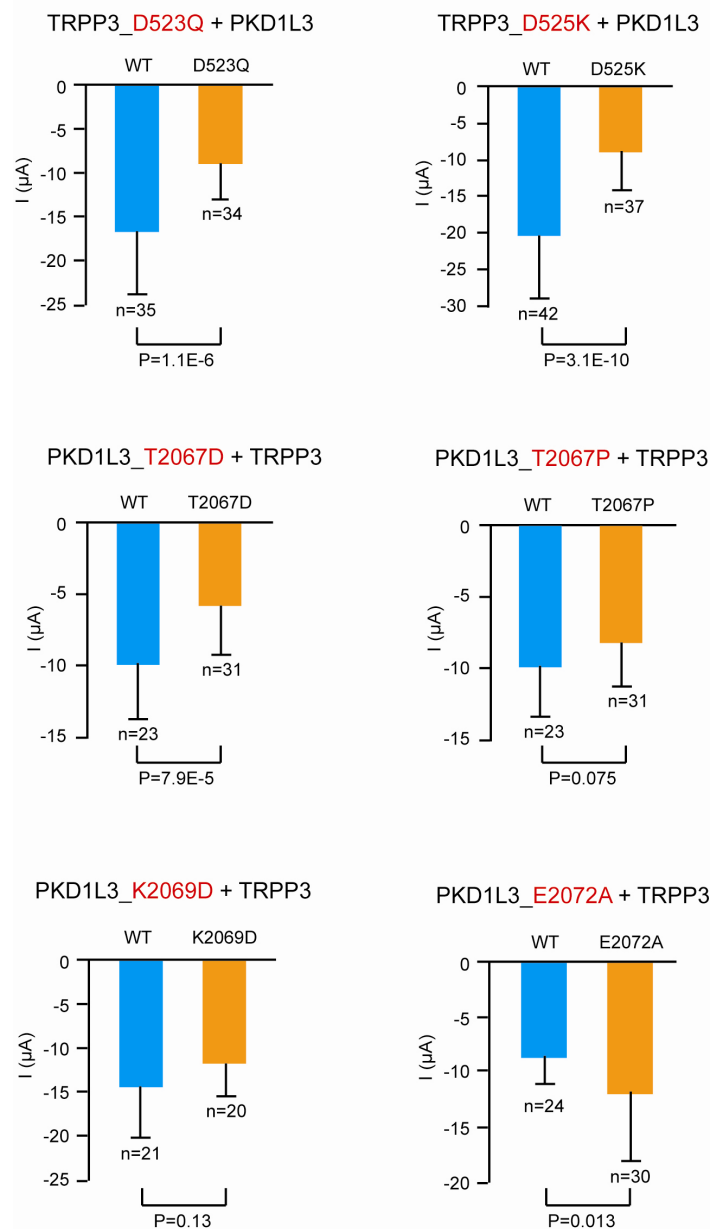

**Supplementary Figure S1. Comparison of peak current amplitude of WT and mutant PKD1L3/TRPP3 complexes.** Currents were elicited by citric acid (pH 2.8) and were recorded at -80 mV from wild type (blue bars) and six different mutant (orange bars). Bath solution contains 100 mM NaCl, 0.5 mM MgCl<sub>2</sub>, 2 mM HEPES, pH 7.5. Each panel was obtained from the same batch of oocytes.

**a** TRPP3\_D523Q + PKD1L3

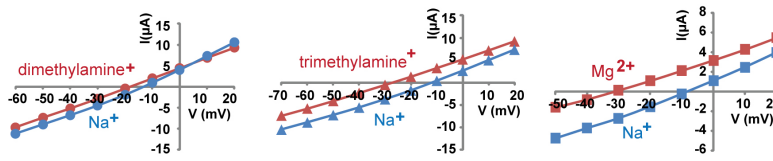

**b** TRPP3\_D525K + PKD1L3

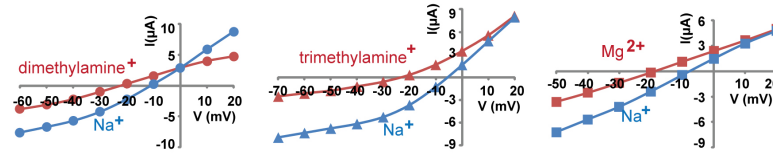

**c** TRPP3 + PKD1L3\_T2067D

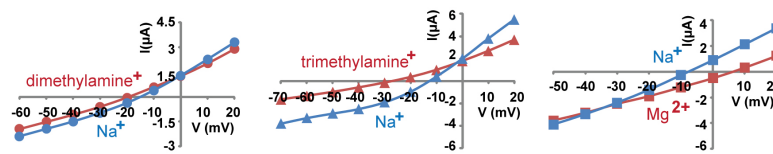

**d** TRPP3 + PKD1L3\_T2067P

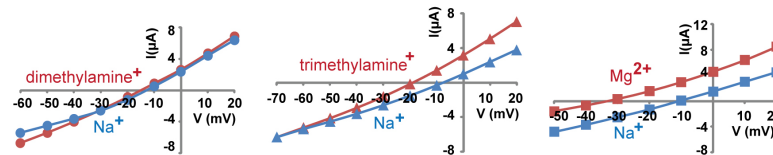

**e** TRPP3 + PKD1L3\_K2069D

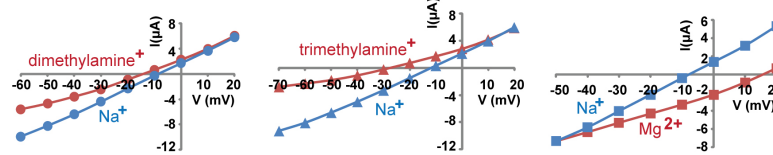

**f** TRPP3 + PKD1L3\_E2072A

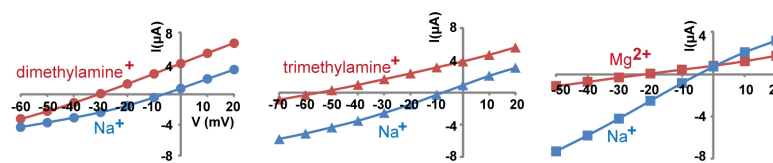

**Supplementary Figure S2. Representative I-V curves of acid-induced currents of mutant PKD1L3/TRPP3 complexes.** The currents were recorded in a bath solution containing either 100 mM NaCl (blue), or 100 mM dimethylamine·HCl, or 100 mM trimethylamine·HCl, or 70 mM MgCl<sub>2</sub> (red). The two I-V curves in each panel were obtained from the same oocyte.

**a** TRPP3\_D523Q + PKD1L3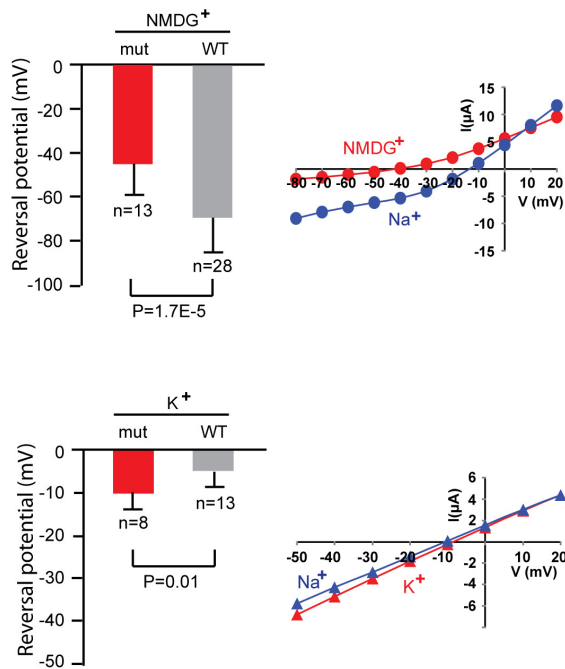**b** TRPP3 + PKD1L3\_K2069D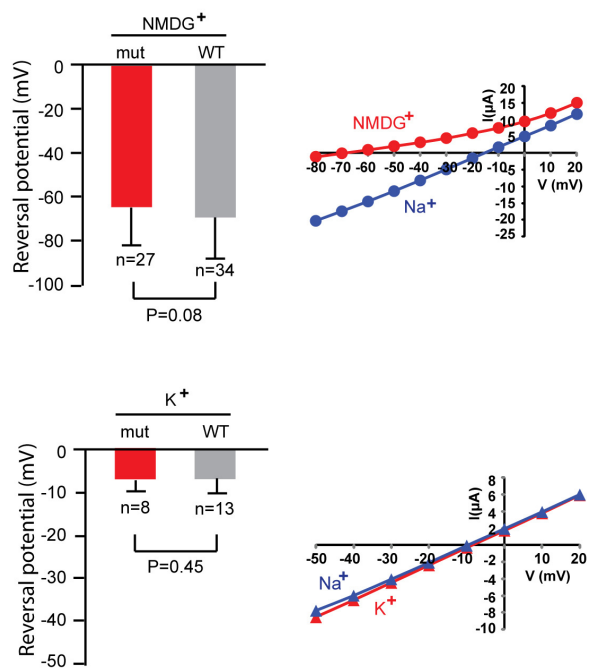**Supplementary Figure S3. Effects of putative pore mutations on the permeability**

**to NMDG<sup>+</sup> and K<sup>+</sup>.** (a and b) Bar graph showing the reversal potential of currents recorded from WT (grey bars) or mutant (red bars) PKD1L3/TRPP3 complexes

(mutation indicated at the top of each panel) in a bath solution containing 100 mM NMDG<sup>+</sup>, or K<sup>+</sup>. All pair-wise data were obtained from the same batch of oocytes.

Compared to WT channels, the TRPP3-D523Q mutation significantly changed the reversal potential in NMDG<sup>+</sup> and K<sup>+</sup>, but the PKD1L3-K2069D mutation did not.

Representative I-V curve for each mutant is shown on the side. The currents were recorded in a bath solution containing either 100 mM NaCl (blue), or 100 mM

NMDG·HCl, or 100 mM KCl. The two I-V curves in each panel were obtained from the same oocyte.

PKD1L3-EGFP

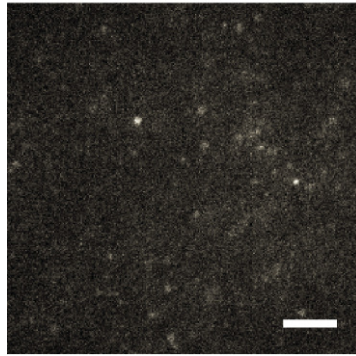

**Supplementary Figure S4. PKD1L3-EGFP alone has no surface expression.**

Representative TIRF image from an oocyte expressing PKD1L3-EGFP alone, showing that PKD1L3 does not traffic to the cell surface on its own. Scale bar, 2  $\mu$ m.

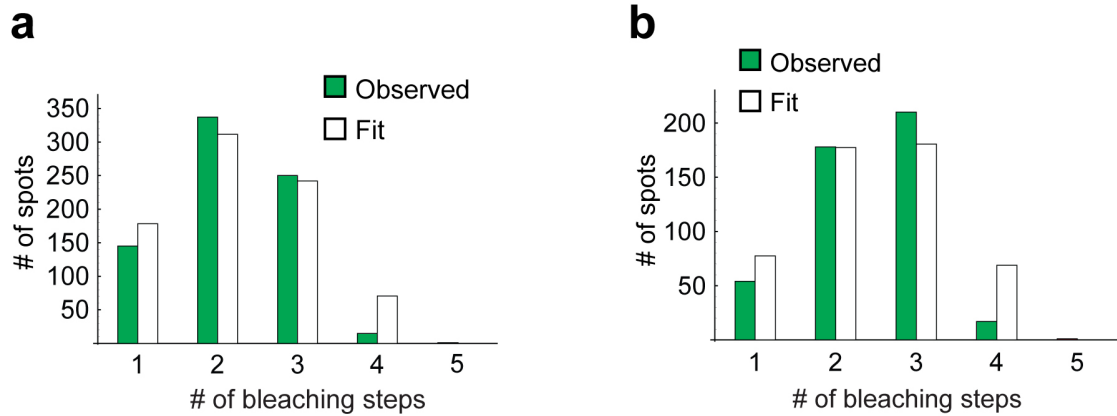

**Supplementary Figure S5. Homomeric TRPP3 and heteromeric PKD1L3/TRPP3 complexes do not contain 4 TRPP3 subunits.** (a) Distribution of observed EGFP bleaching steps (green bars) for TRPP3-EGFP spots on the plasma membrane of *Xenopus* oocytes fits poorly to the calculated distribution (white bars) assuming that 4 EGFP molecules exist in each spot. The best fit was obtained with the probability of GFP to be fluorescent being set to 54%. (b) Distribution of observed EGFP bleaching steps (green bars) for PKD1L3-mCherry and TRPP3-EGFP dual-fluorescence spots fits poorly to the calculated distribution (white bars) assuming that 4 EGFP molecules exist in each spot. Best fit was obtained with a 60% probability of GFP being fluorescent.

**a** PKD1L3 + TRPP3

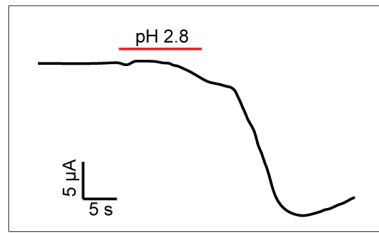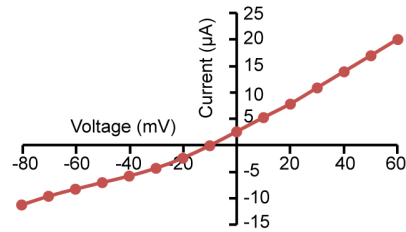

**b** PKD1L3-mCherry + TRPP3-EGFP

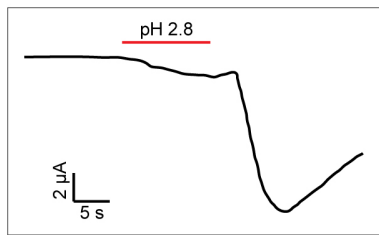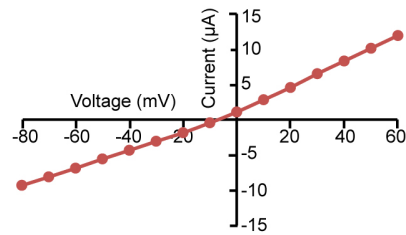

**c** PKD1L3-EGFP + TRPP3-mCherry

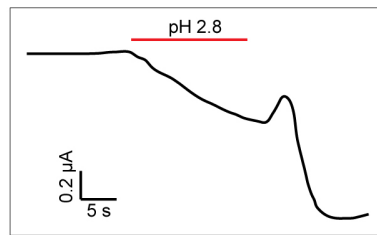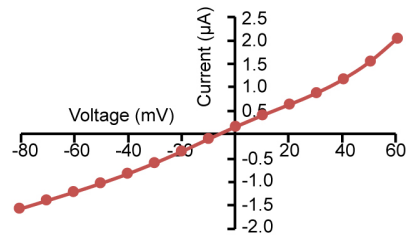

**Supplementary Figure S6. EGFP- and mCherry-tagged TRPP3 and PKD1L3**

**subunits form functional channels.** Left panels: representative whole-cell currents in response to extracellular citric acid (pH 2.8, red bar) recorded in oocytes expressing channels formed by WT PKD1L3 and TRPP3 (**a**), PKD1L3-mCherry and TRPP3-EGFP (**b**), or PKD1L3-EGFP and TRPP3-mCherry (**c**). Holding potential = -60 mV. Right panels: I-V curves of acid-induced currents, obtained at the end of the current traces shown on the left.

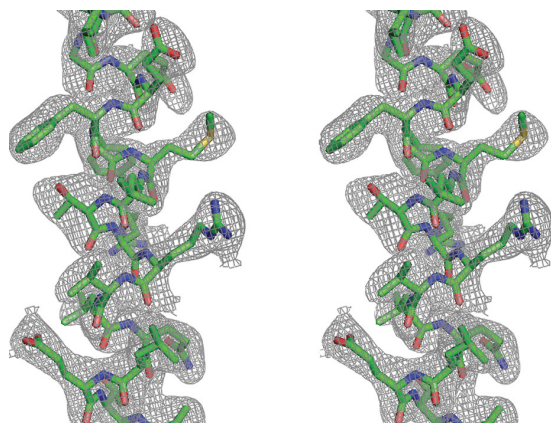

**Supplementary Figure S7. Electron density of the TRPP3 coiled-coil domain.**

Stereo view of the representative electron density map contoured at  $1\sigma$  for the N terminal portion of the TRPP3 coiled-coil domain trimer structure. Only a monomer is shown here.

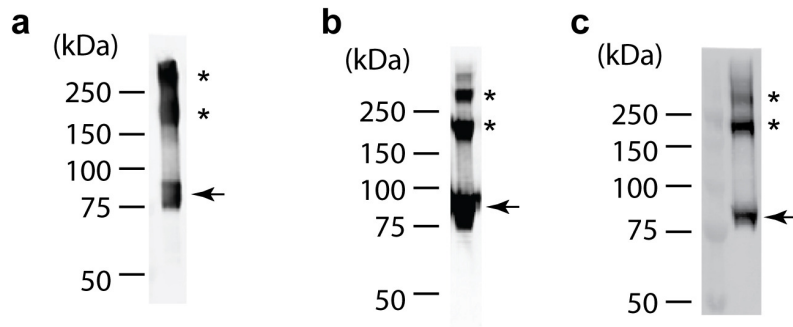

**Supplementary Figure S8. Oligomers of TRPP3 on SDS-PAGE.** (a) Sample was boiled for 3 min with SDS Blue Loading Buffer (New England Biolabs) and 50 mM DTT. Arrow and asterisks indicate TRPP3 monomer and oligomers, respectively. (b) Sample was incubated at 37 °C for 30 min with SDS Blue Loading Buffer, 50 mM DTT and 5%  $\beta$ -mercaptoethanol. (c) Sample was incubated at 37 °C for 30 min with SDS Blue Loading Buffer and 8 M urea, 50 mM DTT and 50 mM Tris[2-carboxyethyl] phosphine hydrochloride (TCEP·HCl, Pierce). In this case, the SDS-PAGE also contained 8 M urea. Compare to DTT, TCEP is a more stable and more effective reducing agent.



**Supplementary Table S1. Permeability ratios of WT and mutant PKD1L3/TRPP3 channels for NMDG<sup>+</sup> and K<sup>+</sup>.**

| Channel type | NMDG <sup>+</sup>                         |                                 | K <sup>+</sup>                            |                              |
|--------------|-------------------------------------------|---------------------------------|-------------------------------------------|------------------------------|
|              | $\Delta E_{\text{rev}} \pm \text{SD} (n)$ | $P_{\text{NMDG}}/P_{\text{Na}}$ | $\Delta E_{\text{rev}} \pm \text{SD} (n)$ | $P_{\text{K}}/P_{\text{Na}}$ |
| Wild Type    | $-60 \pm 14.4 (42)$                       | 0.09                            | $3.1 \pm 1.7 (27)$                        | 1.13                         |
| TRPP3_D523Q  | $-35.3 \pm 12.5 (13)$                     | 0.25                            | $3.3 \pm 1.6 (8)$                         | 1.14                         |
| PKD1L_K2069D | $-52.8 \pm 11.9 (27)$                     | 0.13                            | $4.5 \pm 1.6 (15)$                        | 1.20                         |

$\Delta E_{\text{rev}}$  is the change of reversal potential upon switching the bath solution from Na<sup>+</sup> to the test ions ( $\Delta E_{\text{rev}} = E_{\text{rev},X} - E_{\text{rev},\text{Na}}$ ). Results are shown as mean and standard deviation. n = number of measurements. The reason that the relative permeability of TRPP3-D523Q channels to K<sup>+</sup> was similar to that of WT channels is because the D523Q mutation changed the reversible potential in both K<sup>+</sup> and Na<sup>+</sup> in the same direction and to a similar extent.

## Supplementary Table S2. Data collection and refinement statistics.

| TRPP3- G699-W743                       |                    |
|----------------------------------------|--------------------|
| <b>Data collection</b>                 |                    |
| Space group                            | <i>P</i> 321       |
| Cell dimensions                        |                    |
| <i>a</i> , <i>b</i> , <i>c</i> (Å)     | 44.5, 44.5, 62.3   |
| $\alpha$ , $\beta$ , $\gamma$ (°)      | 90, 90, 120        |
| Resolution (Å)                         | 20-2.8 (2.9-2.8) * |
| $R_{\text{sym}}$ or $R_{\text{merge}}$ | 0.055(0.103)       |
| $\  \sigma \ $                         | 36.7(25.2)         |
| Completeness (%)                       | 99.1(100)          |
| Redundancy                             | 9.0(9.2)           |
| <b>Refinement</b>                      |                    |
| Resolution (Å)                         | 20-2.8             |
| No. reflections                        | 1928               |
| $R_{\text{work}}/ R_{\text{free}}$     | 0.235/0.286        |
| No. atoms                              |                    |
| Protein                                | 357                |
| Ligand/ion                             | 0                  |
| Water                                  | 44                 |
| B-factors                              |                    |
| Protein                                | 46.9               |
| Ligand/ion                             | 0                  |
| Water                                  | 55.2               |
| R.m.s deviations                       |                    |
| Bond lengths (Å)                       | 0.013              |
| Bond angles (°)                        | 1.6                |

A single crystal was used for the dataset.

\*Highest resolution shell is shown in parenthesis.
